# Supplementary material for: Burden of disease attributable to high body mass index: an analysis of data from the Global Burden of Disease Study 2021
Source: PubMed Central journal article supplement — eClinicalMedicine. 2024 Sep 24;76:102848. doi: 10.1016/j.eclinm.2024.102848 (PMC11462227; doi:10.1016/j.eclinm.2024.102848), 2024-09-24
Supplement: mmc2.pdf [file mmc2.pdf]

**A**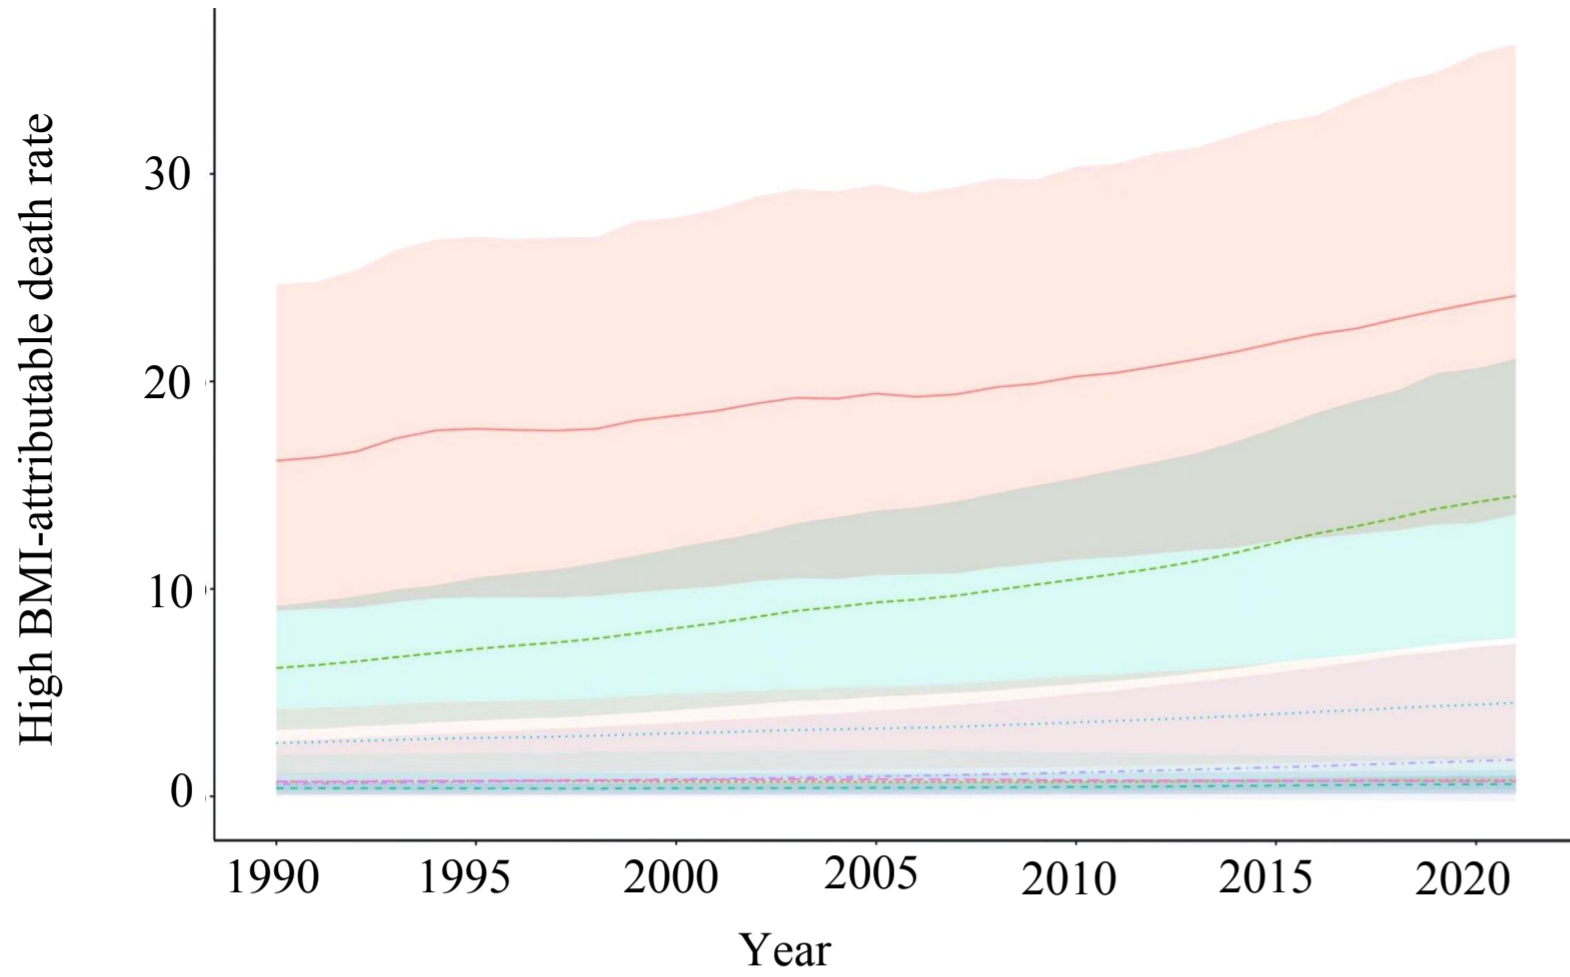**B**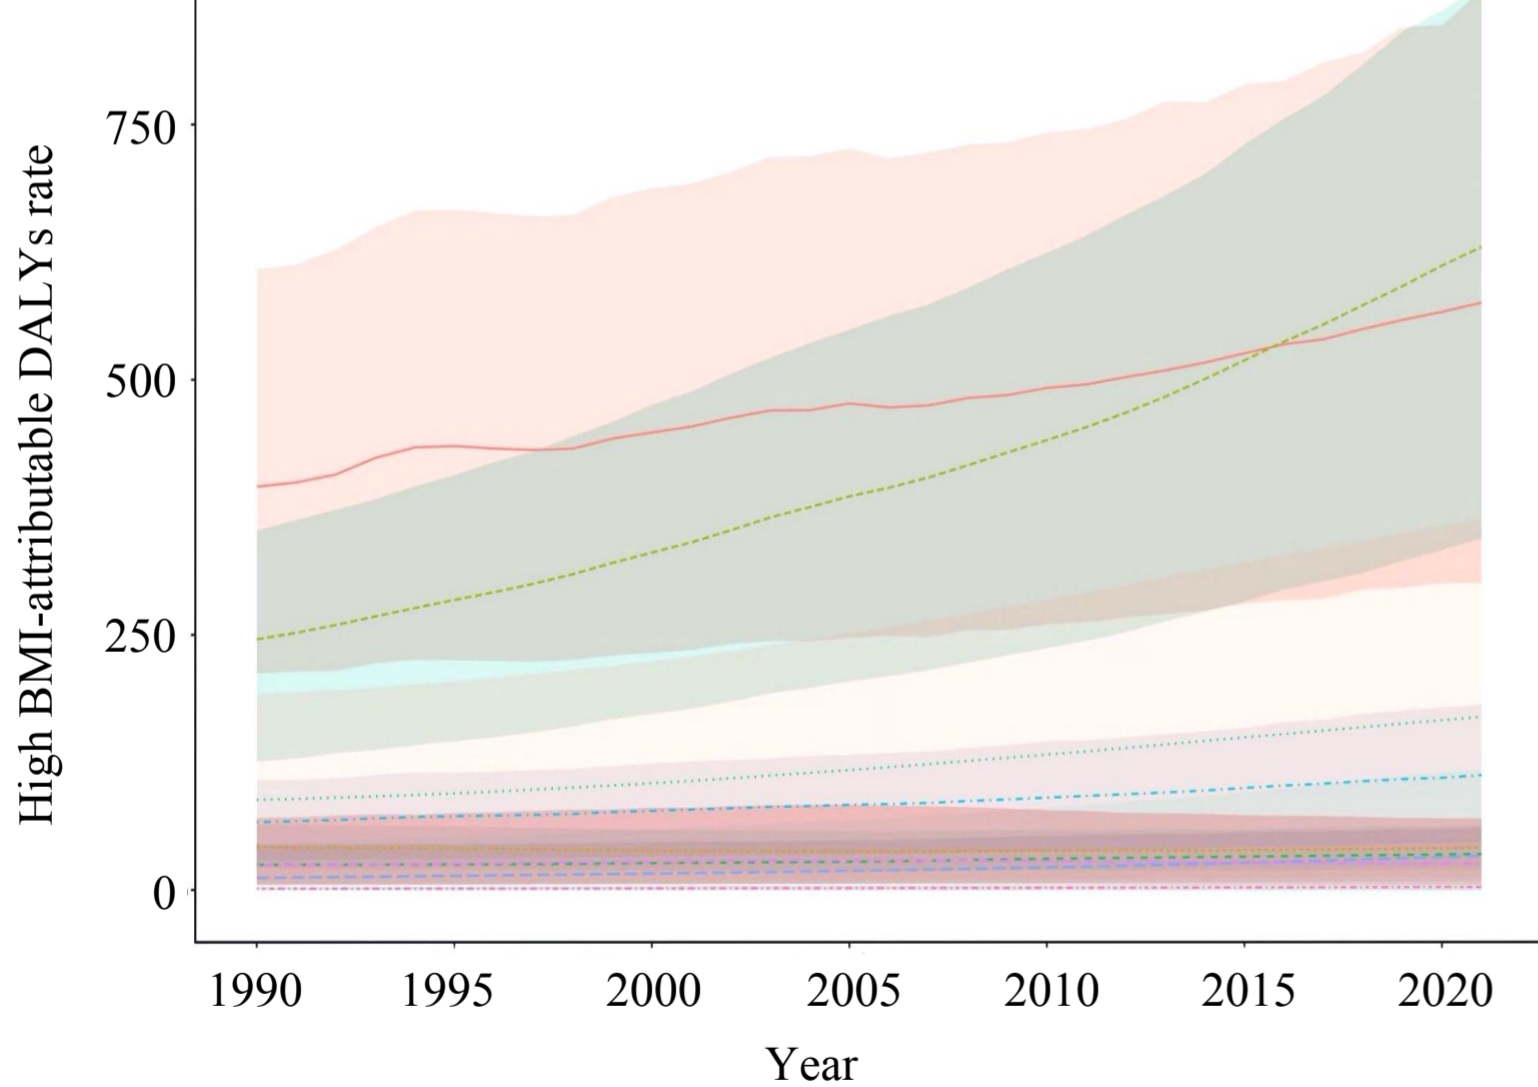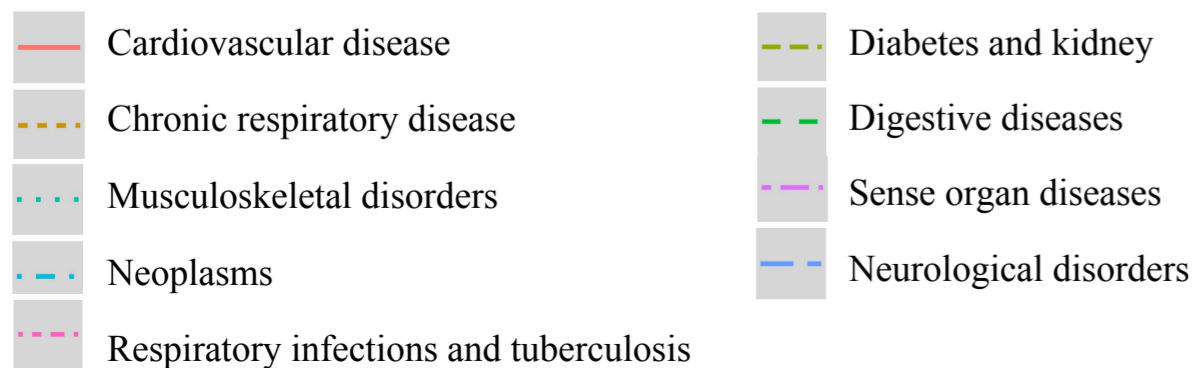**C**

|                                                         | 1   | 2             | 3              |
|---------------------------------------------------------|-----|---------------|----------------|
| <b>Global</b>                                           | DM  | IHD           | HHD            |
| <b>Central Europe, Eastern Europe, and Central Asia</b> | IHD | DM            | Stroke         |
| Central Asia                                            | IHD | DM            | Stroke         |
| Central Europe                                          | IHD | DM            | HHD            |
| Eastern Europe                                          | IHD | DM            | Stroke         |
| <b>High-income</b>                                      | DM  | IHD           | Low back pain  |
| Australasia                                             | DM  | Low back pain | IHD            |
| High-income Asia Pacific                                | DM  | CKD           | Osteoarthritis |
| High-income North America                               | DM  | IHD           | CKD            |
| Southern Latin America                                  | DM  | IHD           | CKD            |
| Western Europe                                          | DM  | IHD           | Low back pain  |
| <b>Latin America and Caribbean</b>                      | DM  | IHD           | CKD            |
| Andean Latin America                                    | DM  | CKD           | IHD            |
| Caribbean                                               | DM  | IHD           | CKD            |
| Central Latin America                                   | DM  | CKD           | IHD            |
| Tropical Latin America                                  | DM  | IHD           | CKD            |
| <b>North Africa and Middle East</b>                     | DM  | IHD           | HHD            |
| <b>South Asia</b>                                       | DM  | IHD           | HHD            |
| <b>Southeast Asia, East Asia, and Oceania</b>           | DM  | IHD           | HHD            |
| East Asia                                               | DM  | IHD           | HHD            |
| Oceania                                                 | DM  | IHD           | HHD            |
| Southeast Asia                                          | DM  | IHD           | HHD            |
| <b>Sub-Saharan Africa</b>                               | DM  | HHD           | IHD            |
| Central Sub-Saharan Africa                              | DM  | HHD           | Tuberculosis   |
| Eastern Sub-Saharan Africa                              | DM  | HHD           | IHD            |
| Southern Sub-Saharan Africa                             | DM  | HHD           | IHD            |
| Western Sub-Saharan Africa                              | DM  | HHD           | IHD            |
