# Supplementary figures and images for: Burden of disease attributable to high body mass index: an analysis of data from the Global Burden of Disease Study 2021
Source: PubMed Central journal article supplement — eClinicalMedicine. 2024 Sep 24;76:102848. doi: 10.1016/j.eclinm.2024.102848 (PMC11462227; doi:10.1016/j.eclinm.2024.102848), 2024-09-24

**A**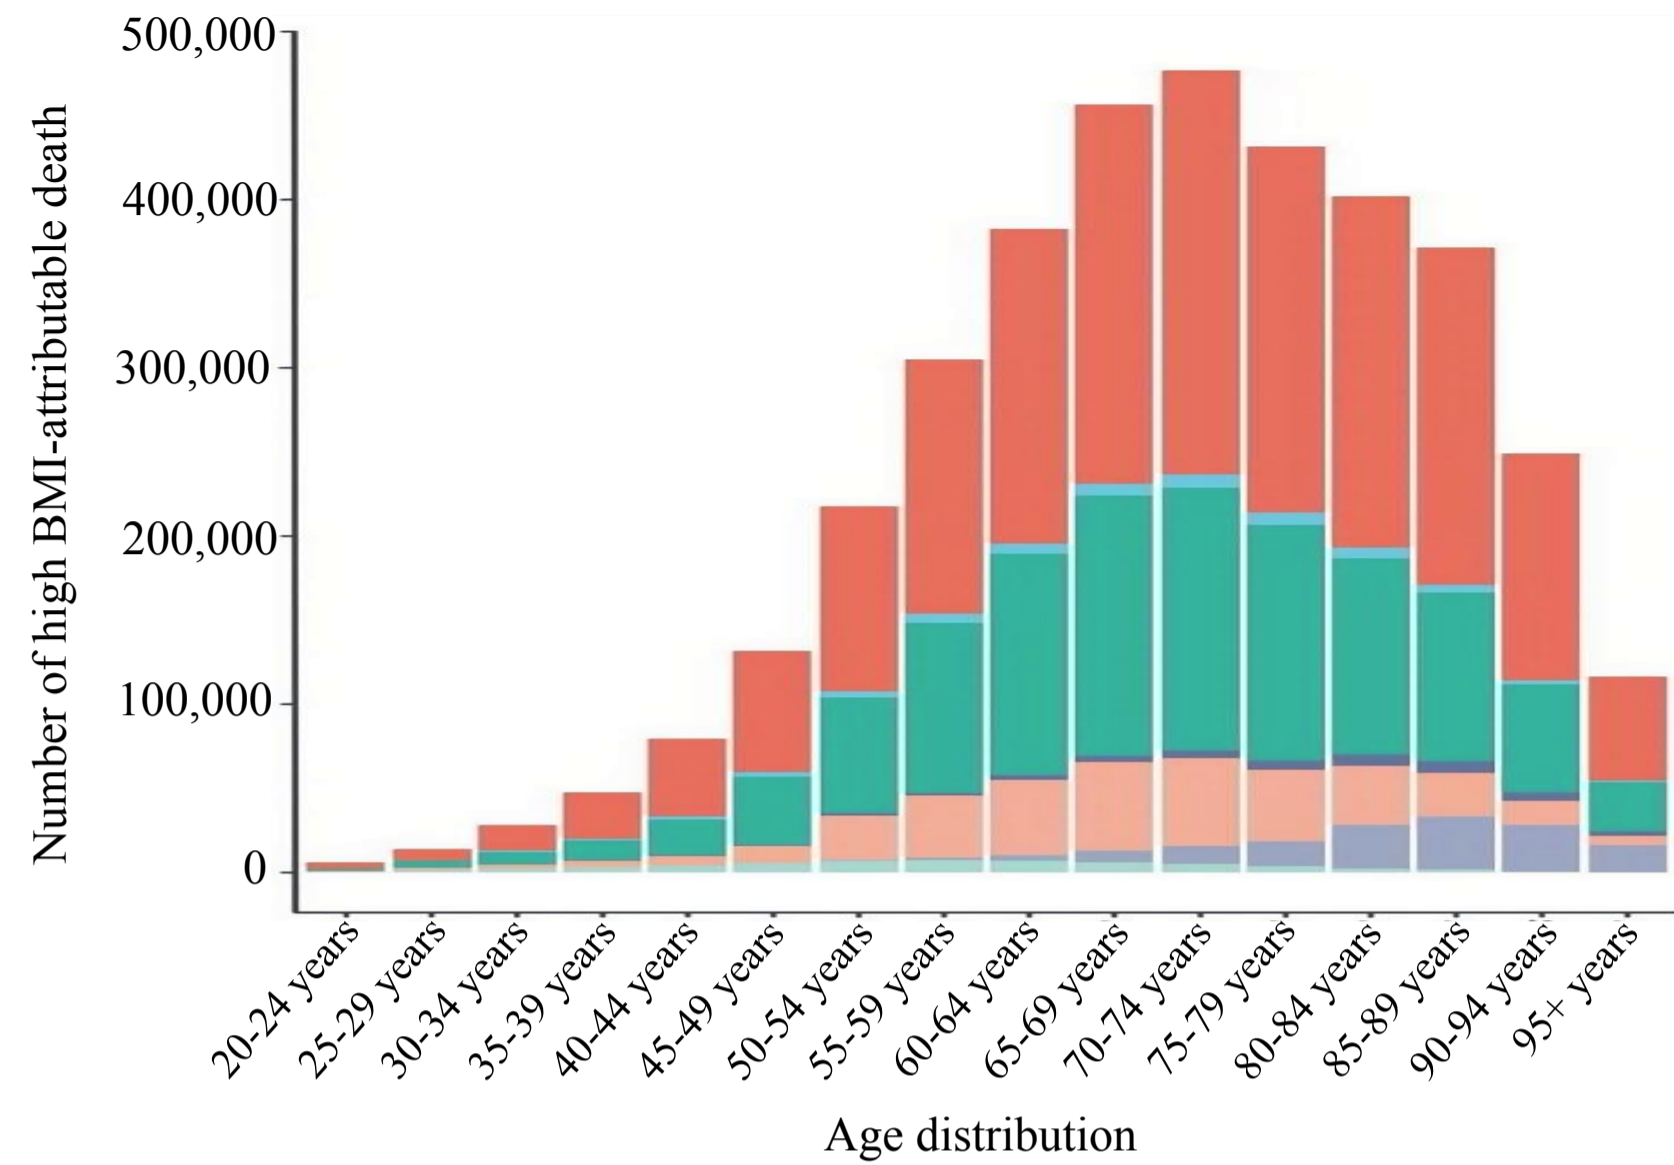**B**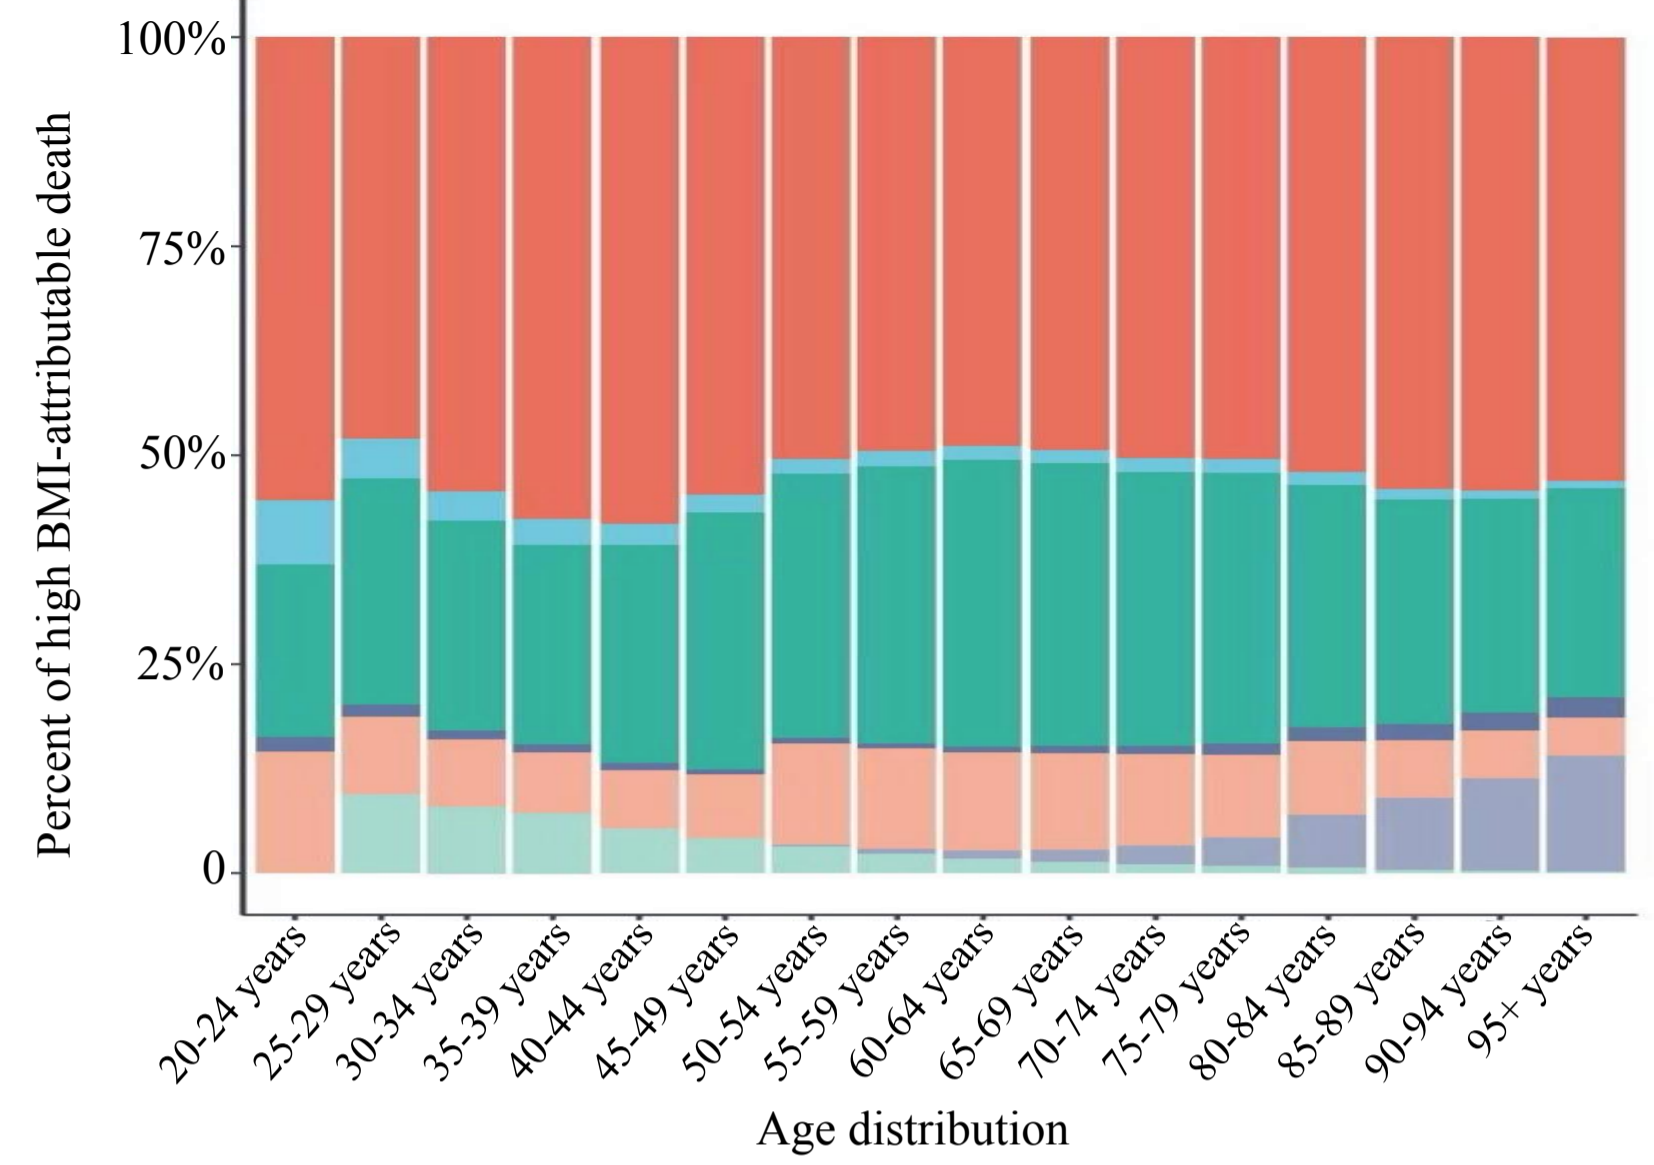**C**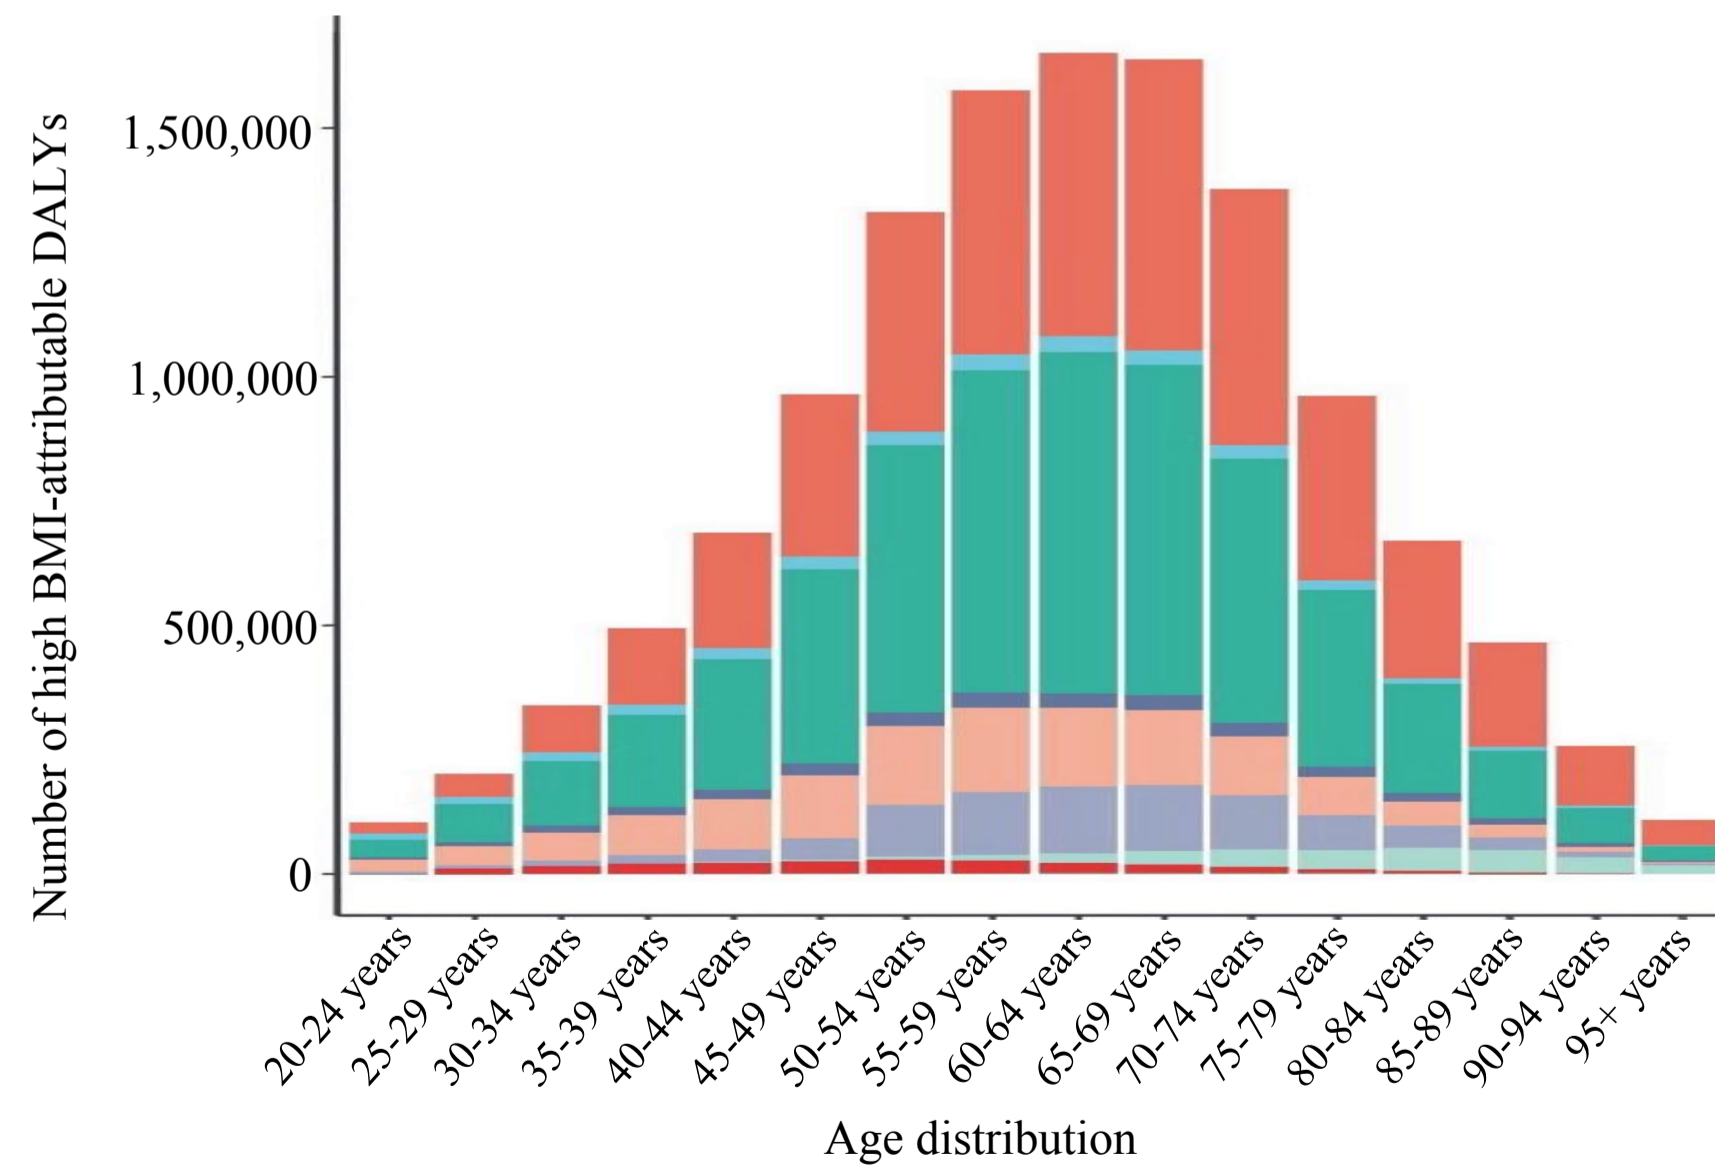**D**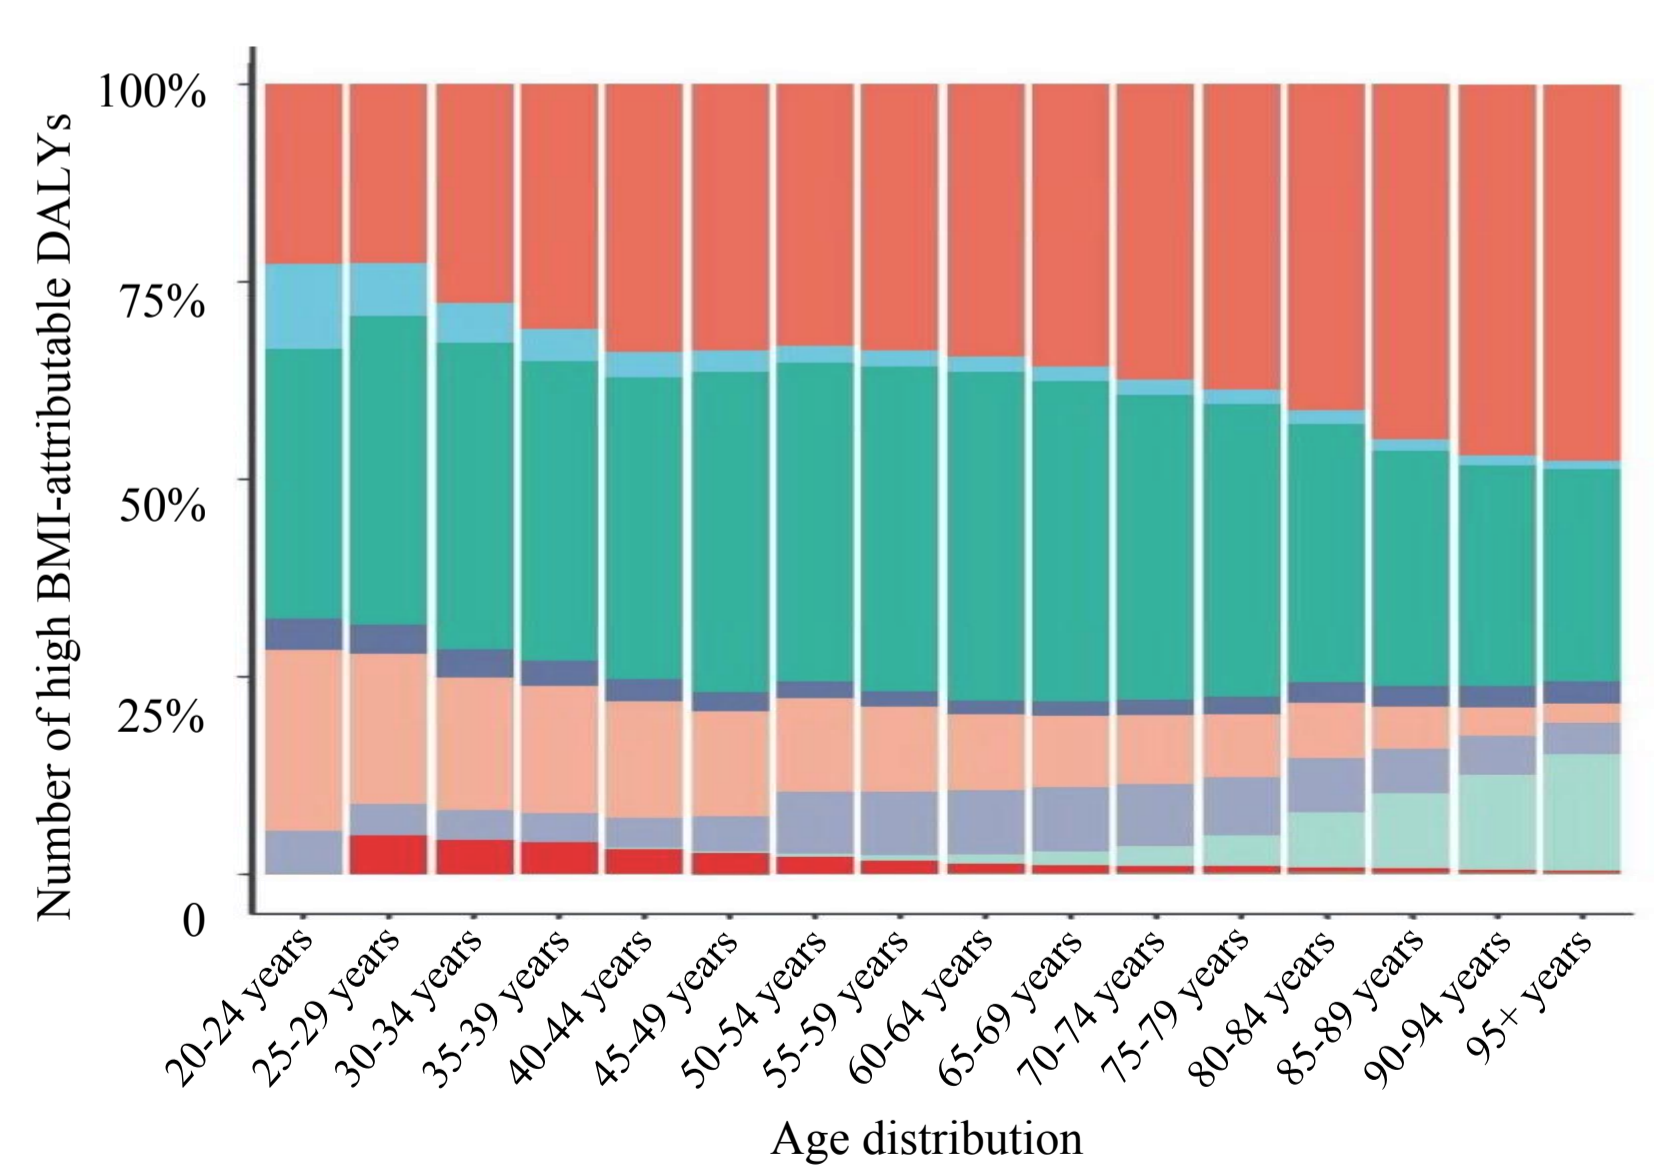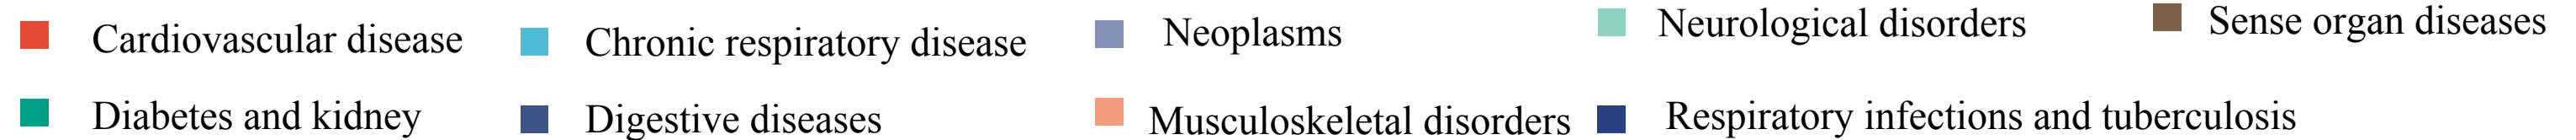

Supplement: mmc1.pdf [file mmc1.pdf]
